# Supplementary material
Source: publisher site journal article supplement (https://www.dovepress.com/article/558687)
Supplement: Supplementary file 1 [file 558687%20Revised%20Supplementary%20Material.docx]

**Development and external validation of a machine learning-based model for predicting heart failure risk in type 2 diabetes**

| **Table S1** | Comparison of discrimination characteristics among five RF models | Page 3 |
| --- | --- | --- |
| **Table S2** | Summary of statistical analyses and methods | Page 4 |
| **Fig. S1** | Selection process of the value of lambda by LASSO regression with cross validation in the training cohort | Page 5 |
| **Fig. S2** | Comparison of AUCs between different machine learning models in the training cohort | Page 6 |
| **Fig. S3** | Confusion matrix curve to verifying the performance of RF model in the training cohort | Page 7 |
| **Fig. S4** | Confusion matrix curve to verifying the performance of different RF model in the training cohort | Page 8 |
| **Fig. S5** | Distribution of elevated NT-proBNP risk | Page 9 |

**Table S1.** **Comparison of discrimination characteristics among five RF models.**

| Model | AUC | Accuracy | Sensitivity | Specificity | Kappa | PPV | NPV |
| --- | --- | --- | --- | --- | --- | --- | --- |
| RF | 0.892 | 0.823 | 0.726 | 0.870 | 0.598 | 0.734 | 0.866 |
| RF (Top 10) | 0.949 | 0.871 | 0.898 | 0.857 | 0.721 | 0.756 | 0.945 |
| RF (Top 8) | 0.900 | 0.844 | 0.747 | 0.892 | 0.644 | 0.772 | 0.878 |
| RF (Top 6) | 0.944 | 0.858 | 0.871 | 0.852 | 0.693 | 0.743 | 0.931 |
| RF (Top 5) | 0.895 | 0.803 | 0.801 | 0.804 | 0.576 | 0.668 | 0.891 |

AUC, area under the curve; NPV, negative predictive value; PPV, positive predictive value; RF, random forest

**Table S2 Summary of statistical analyses and methods.**

| Analysis Purpose | Method Name | Software/Tool |
| --- | --- | --- |
| Normality Test | Kolmogorov-Smirnov test | SPSS 27.0 |
| Data Presentation | Mean (Standard Deviation) | SPSS 27.0 |
|  | Median (Interquartile Range) |  |
|  | Proportions (n, %) |  |
| Descriptive Statistics | Student's t-test | SPSS 27.0 |
|  | Mann-Whitney U test |  |
|  | Chi-squared test / Fisher's exact test |  |
| Data Preprocessing & Feature Selection | LASSO | R software |
| Machine Learning Model Building & Validation | 10-Fold Cross-Validation | R software |
| Model Performance Evaluation | AUC  Sensitivity  Specificity  Accuracy  PPV  NPV | R software |
|  |  |
| Model Interpretability | SHAP | R software |
| Nomogram Evaluation | Calibration Curve | R software |
|  | Hosmer-Lemeshow Test |  |
|  | DCA |  |

AUC, area under the curve; DCA, decision curve analysis; LASSO, least absolute shrinkage and selection operator; NPV, negative predictive value; PPV, positive predictive value; SHAP, SHapley Additive exPlanations.

**
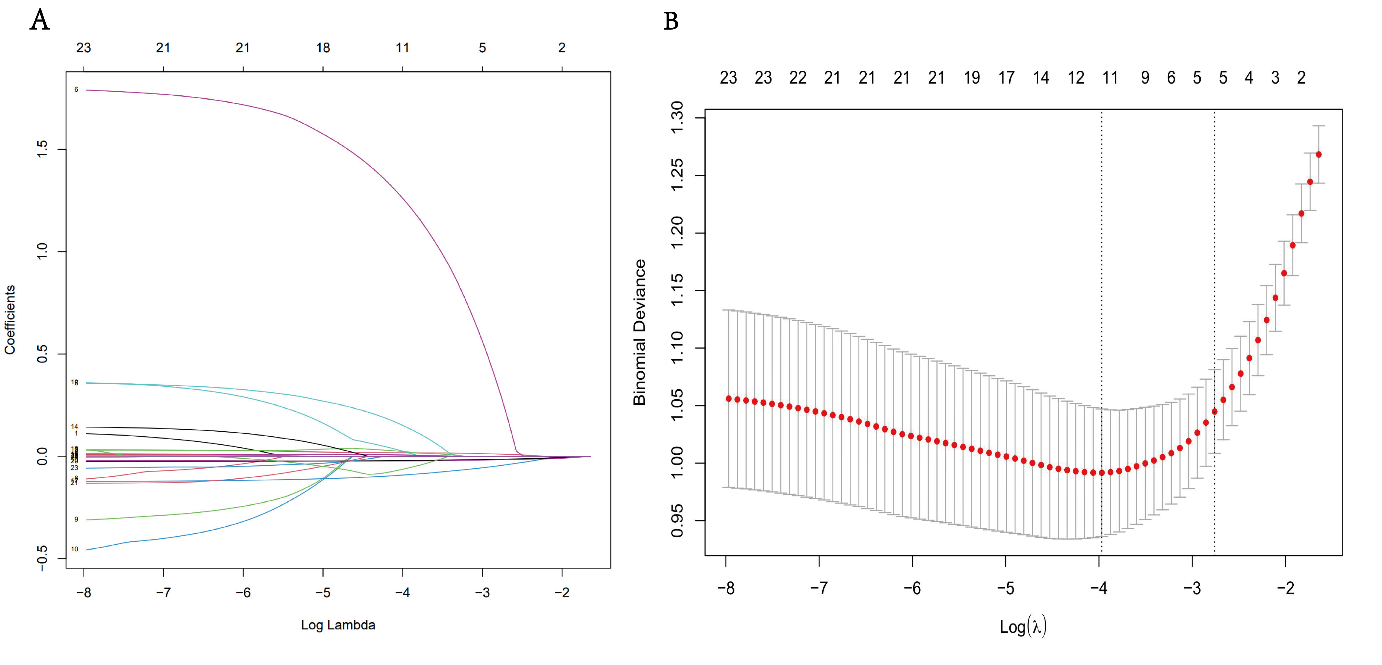
**

**Figure S1. Selection process of the value of lambda by the least absolute shrinkage and selection operator (LASSO) regression with cross validation in the training cohort**.

Variables with differences in the univariate analysis were included in the LASSO.A: Identification of the optimal penalization coefficient lambda (λ) in the Lasso model using 10-fold cross-validation and the minimum criterion. B: Lasso coefficient profiles of the 25 clinical features.

**
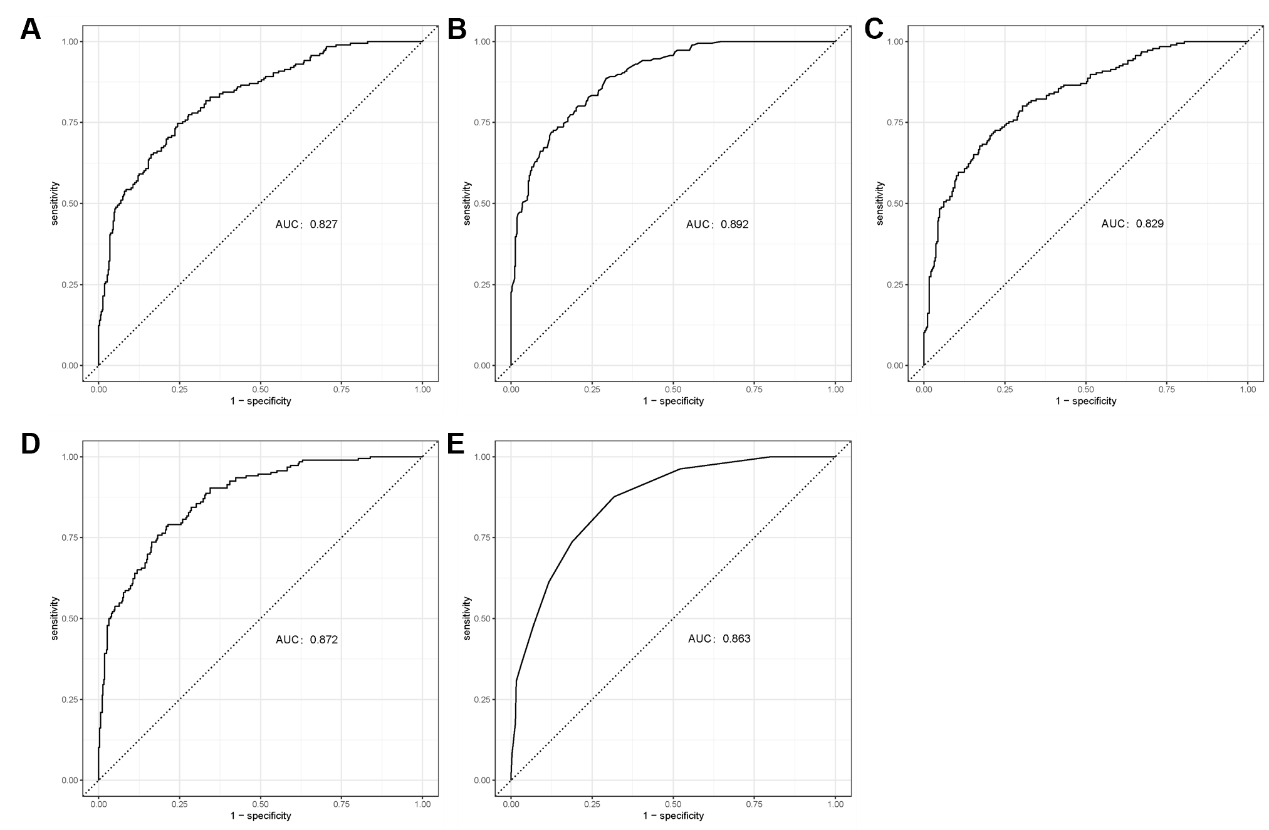
**

**Figure S2. Comparison of AUCs between different machine learning models in the training cohort.**

A: LR model. B: RF model. C: SVM model. D: XGBoost model. E: KNN model. AUCs, area under the curves.

**
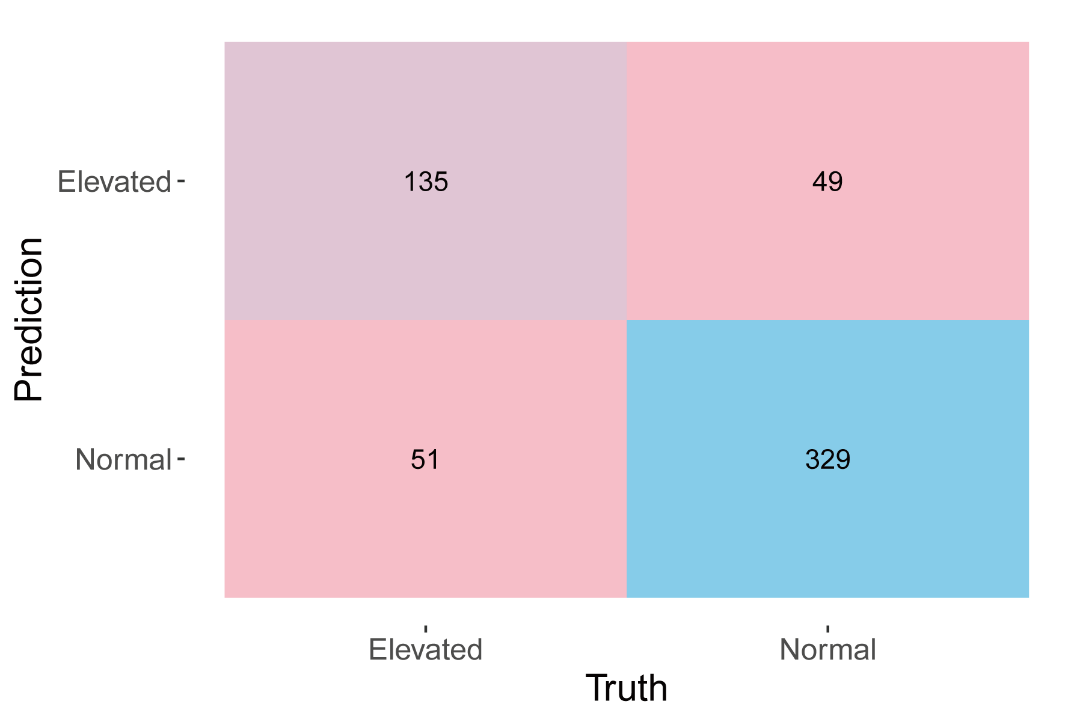
**

**Figure S3. Confusion matrix curve to verifying the performance of RF model in the training cohort.**

**
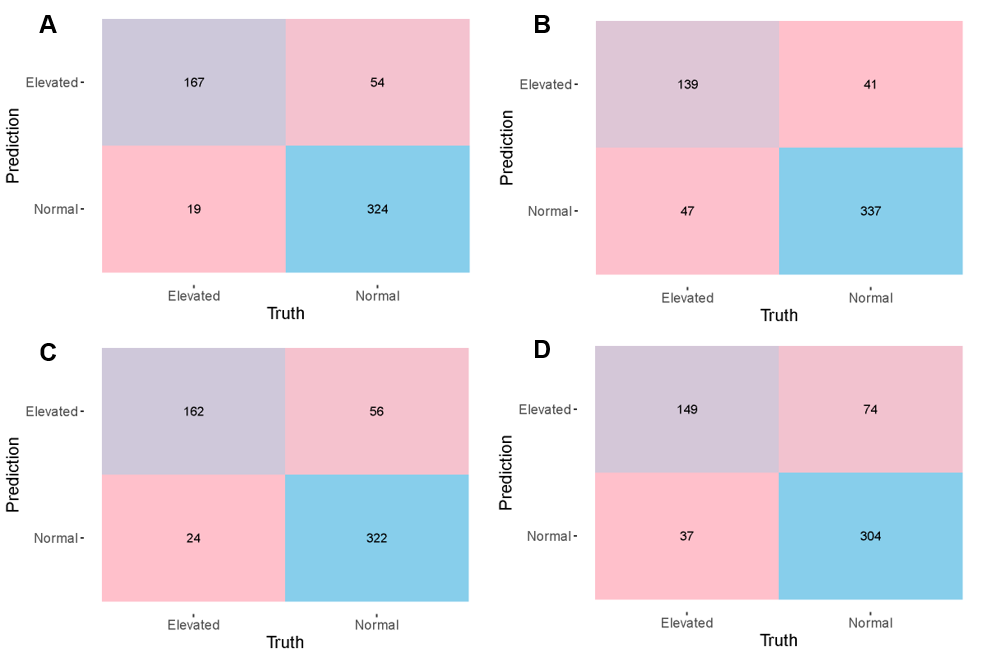
**

**Figure S4. Confusion matrix curve to verifying the performance of different RF model in the training cohort.**

We included the variables in the RF machine learning models in accordance with their relative importance and compared different RF models. A: RF (Top 10) model. B: RF (Top 8) model. C: RF (Top 6) model. D: RF (Top 5) model.

**
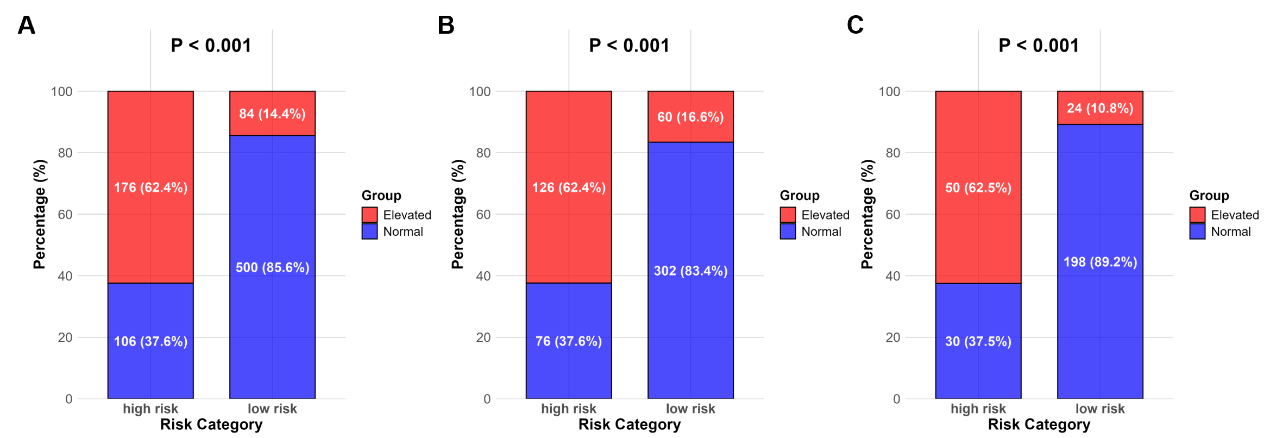
**

**Figure S5. Distribution of elevated NT-proBNP risk.**

The predicted risk of elevated NT-proBNP (≥125 pg/mL) in (A) the entire study population, (B) the training cohort, and (C) the external validation cohort. Patients were stratified into high risk and low risk groups based on the optimal cut-off value of 138.2 points for the nomogram-derived risk score, as determined by the Youden index.
